# Supplementary material
Source: publisher site journal article supplement (https://www.dovepress.com/article/525027)
Supplement: Supplementary file 1 [file Supplementary%20Material.pdf]

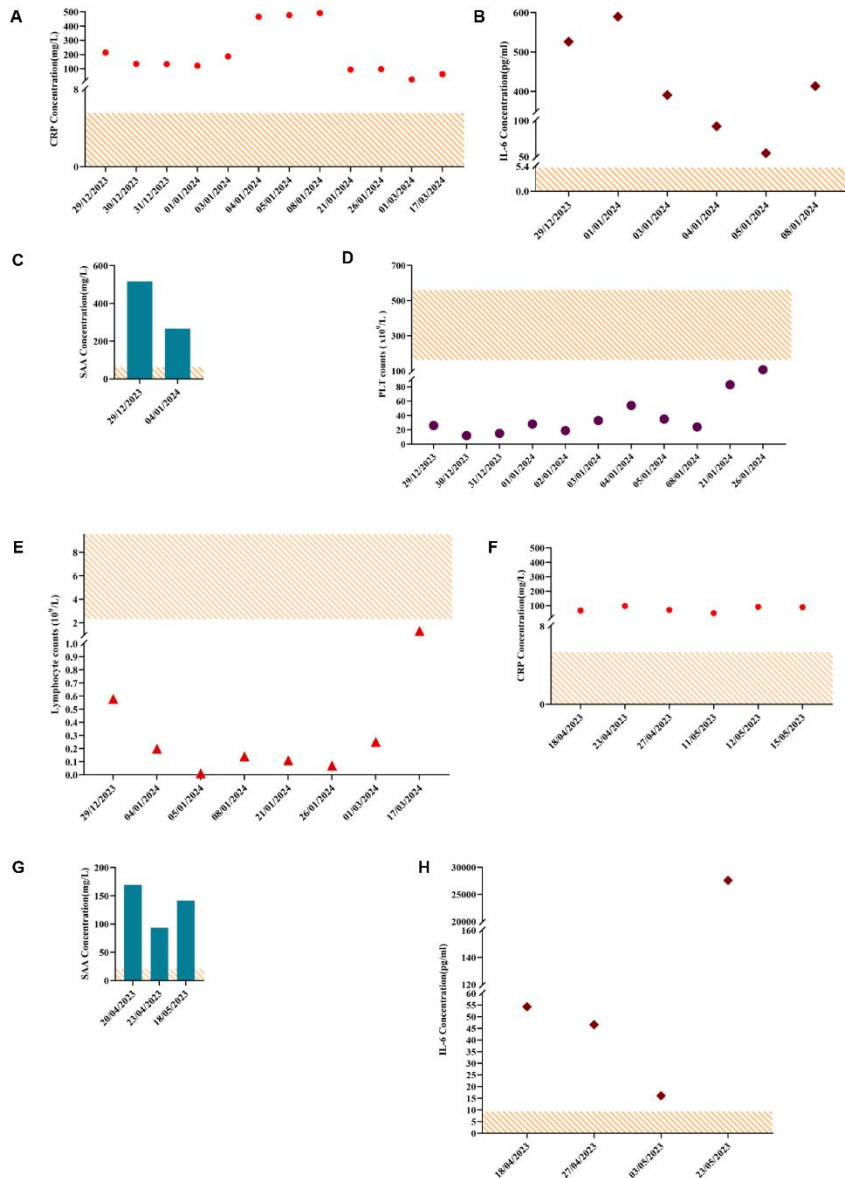

**Figure S1 Results of inflammatory markers in II-1 of Family I and II**

(A-E) Blood tests of the patient (II-1) from Family I, showing significantly elevated inflammatory markers (CRP, SAA, and IL-6) and persistently low platelet and lymphocyte counts. (F-H) Blood tests of the patient (II-1) from Family II, showing reduced levels of inflammatory markers (CRP, SAA, and IL-6). The X-axis indicates the date when the patient underwent testing for the relevant indicator, while the Y-axis represents the corresponding values of each indicator.

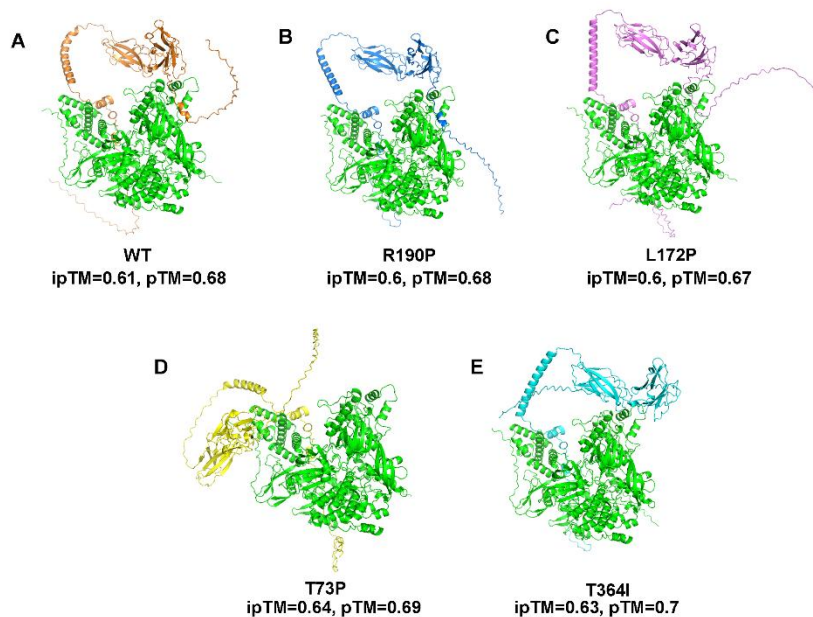

### Figure S2 The predicted results of AlphaFold

The results showed that both the WT and the four mutant proteins interact with JAK3. In panels A-E, the green protein represents protein JAK3, while the other colors correspond to the WT and the four mutant IL2RG proteins, respectively. The ipTM score measures the accuracy of predictions of one component of the complex relative to the other components (0-1). The values higher than 0.8 represent confident high-quality predictions, while values below 0.6 suggest likely a failed prediction. ipTM values between 0.6 and 0.8 are a gray zone where predictions could be correct or incorrect. The predicted TM (pTM) score is a single-value metric reflecting the accuracy of the overall predicted structure (0-1), with higher scores indicating greater reliability. A pTM score above 0.5 means the overall predicted fold for the complex might be similar to the true structure.

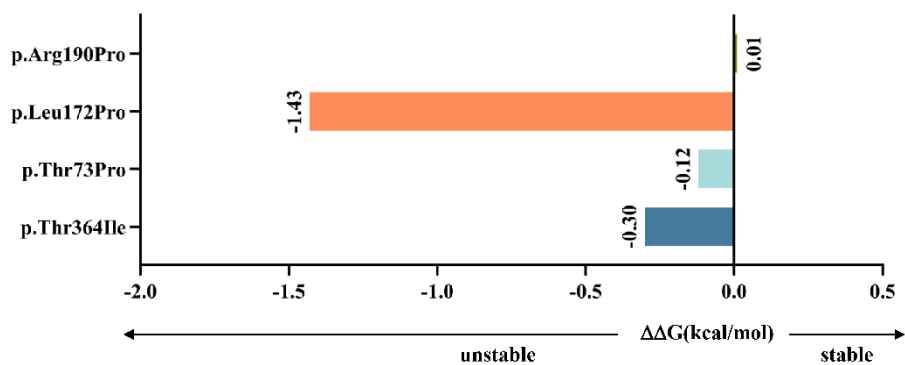

**Figure S3 Stability predictions of IL2RG mutants (p.R190P, p.L172P, p.T73P and p.T364I) by DynaMut2 tool**

Three variants (p.L172P, p.T73P, and p.T364I) were predicted to be instable, with p.L172P being the most unstable.

**Table S1** Prediction of pathogenicity by bioinformatics

| Family | Individuals | Gene         | Variant | Exon | Prediction of pathogenicity by bioinformatics |       |                 |
|--------|-------------|--------------|---------|------|-----------------------------------------------|-------|-----------------|
|        |             |              |         |      | Polyphen2                                     | CADD  | Mutation Taster |
| I      | II-1        | <i>IL2RG</i> | p.R190P | 4    | PD                                            | 24.8  | DC              |
| II     | II-1        | <i>IL2RG</i> | p.L172P | 4    | PD                                            | 26.2  | DC              |
| III    | II-1        | <i>IL2RG</i> | p.T73P  | 2    | PD                                            | 26    | DC              |
| IV     | III-1       | <i>IL2RG</i> | p.T364I | 8    | B                                             | 14.13 | Poly            |

**Table S2** X-SCID molecular case reports or series in China

| Patient number | Exons | Nucleotide change    | Amino acid change | Mutation type | References |
|----------------|-------|----------------------|-------------------|---------------|------------|
| 1              | 1     | UTR5 exon1 del       | /                 | Splicing      | 21         |
| 2              | 1     | c.52delG             | L18Cfs*           | Nonsense      | 22         |
| 3              | 2     | c.202G>A             | E68K              | Missense      | 23         |
| 4              | 2     | g.IVS2-2 A>C         | /                 | Splicing      | 24         |
| 5              | 2     | c.147_150 ins ACTA   | 44Tfs*49          | Frame shift   | 24         |
| 6              | 2     | c.269+1G>T           | /                 | Splicing      | 21         |
| 7              | 2     | c.172C>A             | P58T              | Missense      | 21         |
| 8              | 2     | c.202G>A             | E68K              | Missense      | 21         |
| 9              | 2     | c.209T>C             | M70T              | Missense      | 21         |
| 10             | 2     | c.260T>C             | L87P              | Missense      | 25         |
| 11             | 3     | c.445C>T             | Q149*             | Nonsense      | 23         |
| 12             | 3     | c.316_318delinsGTGAT | L106Vfs*42        | Frame shift   | 2          |
| 13             | 3     | c.295C>A             | S94*              | Nonsense      | 24         |
| 14             | 3     | c.304T>C             | C102R             | Missense      | 24         |
| 15             | 3     | c.312C>T             | Q100*             | Nonsense      | 24         |
| 16             | 3     | c.324-325CA>G        | H104fs*146        | Frame shift   | 24         |

|    |   |               |            |             |    |
|----|---|---------------|------------|-------------|----|
| 17 | 3 | c.385T>C      | L124P      | Missense    | 24 |
| 18 | 3 | c.391C>T      | Q131*      | Nonsense    | 26 |
| 19 | 3 | c.270-1G>C    | /          | Splicing    | 21 |
| 20 | 3 | c.420A>T      | R140S      | Missense    | 27 |
| 21 | 3 | c.324-325CA>G | H104fs*146 | Frame shift | 28 |
| 22 | 3 | c.385T>C      | L124P      | Missense    | 28 |
| 23 | 3 | c.390C>T      | Q126*      | Nonsense    | 28 |
| 24 | 3 | c.435delC     | Q141fs*146 | Frame shift | 28 |
| 25 | 3 | c.373-374insA | K120fs*167 | Frame shift | 28 |
| 26 | 4 | c.548T>A      | L183*      | Nonsense    | 23 |
| 27 | 4 | c.483C>T      | P157S      | Missense    | 24 |
| 28 | 4 | c.529T>C      | L172P      | Missense    | 24 |
| 29 | 4 | c.580ins T    | Y189fs*201 | Frame shift | 24 |
| 30 | 4 | c.557dupT     | /          | Splicing    | 25 |
| 31 | 4 | c.576C>T      | Q188*      | Nonsense    | 28 |
| 32 | 4 | c.521delG     | Q169fs*170 | Frame shift | 28 |
| 33 | 5 | c.722G>T      | S241I      | Missense    | 23 |
| 34 | 5 | c.670C>T      | R224W      | Missense    | 23 |

|    |   |                         |             |             |    |
|----|---|-------------------------|-------------|-------------|----|
| 35 | 5 | c.677G>A                | R226H       | Missense    | 23 |
| 36 | 5 | c.595-430_757+140del723 | E199Rfs*218 | Frame shift | 23 |
| 37 | 5 | c.711G>A                | W237*       | Nonsense    | 23 |
| 38 | 5 | c.684C>T                | R224W       | Missense    | 24 |
| 39 | 5 | c.732T>C                | W240R       | Missense    | 24 |
| 40 | 5 | c.738G>A                | W246*       | Nonsense    | 24 |
| 41 | 5 | c.670C>G                | R224W       | Missense    | 21 |
| 42 | 5 | c.664C>T                | R222C       | Missense    | 21 |
| 43 | 5 | c.677C>T                | R226H       | Missense    | 29 |
| 44 | 5 | 718T>C                  | W240R       | Missense    | 30 |
| 45 | 5 | c.676C>T                | R226C       | Missense    | 25 |
| 46 | 5 | c.691G>A                | R226H       | Missense    | 28 |
| 47 | 5 | c.684C>T                | R224W       | Missense    | 28 |
| 48 | 5 | c.736G>T                | S241I       | Missense    | 28 |
| 49 | 5 | c.725G>A                | W237*       | Nonsense    | 28 |
| 50 | 6 | c.854G>C                | /           | Splicing    | 23 |
| 51 | 6 | c.849G>A                | V279M       | Missense    | 24 |

| R285Q/Change of exon6/intron6 splice |   |                              |                                                              |  |                   |    |
|--------------------------------------|---|------------------------------|--------------------------------------------------------------|--|-------------------|----|
| 52                                   | 6 | c.868G>A                     | junction from CG/GT to CA/GT, predicted<br>aberrant splicing |  | Missense/Splicing | 24 |
| 53                                   | 6 | g.IVS6+5G>A                  | /                                                            |  | Splicing          | 24 |
| 54                                   | 6 | c.854G>A                     | R285Q                                                        |  | Missense          | 31 |
| 55                                   | 6 | c.794T>A                     | I265N                                                        |  | Missense          | 32 |
| 56                                   | 6 | c.849delG                    | V279fs*293                                                   |  | Frame shift       | 28 |
| 57                                   | 6 | g.IVS6+5G>A                  | /                                                            |  | Splicing          | 28 |
| 58                                   | 6 | g.IVS6+5G>A                  | /                                                            |  | Splicing          | 28 |
| 59                                   | 7 | g.IVS7-72 to IVS8-11del487   | Exon 7 del                                                   |  | Frame shift       | 24 |
| 60                                   | 7 | c.879C>T                     | R289*                                                        |  | Nonsense          | 24 |
| 61                                   | 7 | c.924+5G>C                   | /                                                            |  | Splicing          | 5  |
| 62                                   | 7 | g.IVS6-72 to g.IVS7-11del487 | Exon7del                                                     |  | Frame shift       | 28 |
| 63                                   | 7 | c.868G>A                     | /                                                            |  | Splicing          | 28 |
| 64                                   | 8 | c.925-13 T > G               | /                                                            |  | Splicing          | 33 |

---
